# Supplementary material for: Family-Centered Design: Interactive Performance Testing and User Interface Evaluation of the Slovenian eDavki Public Tax Portal
Source: MDPI journal article supplement (doi:10.3390/s21155161), 2021-07-30
Supplement: s1 [file s1]

# Family-Centered Design: Interactive Performance Testing and User Interface Evaluation of the Slovenian eDavki Public Tax Portal

Jure Trilar \*, Tjaša Sobočan and Emilija Stojmenova Duh

ICT Department, Faculty of Electrical Engineering, University of Ljubljana, 1000 Ljubljana, Slovenia;  
Tjasa.Sobocan@ltfe.org (T.S.); emilija.stojmenova@fe.uni-lj.si (E.S.D.)  
\* Correspondence: jure.trilar@fe.uni-lj.si

## 1. Testing platform

**Table S1.** Testing timeframe and responses.

|              |                     |
|--------------|---------------------|
| First start  | 2021-04-12 12:19:15 |
| Last finish  | 2021-04-26 18:01:36 |
| Duration     | 14 days             |
| Participants | 152                 |

**Table S2.** Measured cumulatives.

|                      | Interface 1   | Interface 2   |
|----------------------|---------------|---------------|
| Total time           | 14,952,966 ms | 12,576,724 ms |
| Clicks               | 1640          | 1598          |
| First starts (order) | 74            | 78            |

**Table S3.** Questionnaires collected.

|          | Interface 1 | Interface 2 |
|----------|-------------|-------------|
| SUS      | 73          | 75          |
| UEQ      | 70          | 75          |
| NASA-TLX | 70          | 74          |

**Table S4.** Operating System.

| OS      | N   | %      |
|---------|-----|--------|
| Windows | 113 | 74.34% |
| Mac OS  | 26  | 17.11% |
| Linux   | 13  | 8.55%  |

**Table S5.** Screen resolution => Frequency.

|                 |                |                |                |
|-----------------|----------------|----------------|----------------|
| 1920x1080 => 41 | 1280x1024 => 4 | 2752x1152 => 1 | 820x1180 => 1  |
| 1920x1200 => 26 | 1280x720 => 4  | 3072x1728 => 1 | 2294x960 => 1  |
| 1536x864 => 15  | 2048x1152 => 3 | 1792x1120 => 1 | 1979x1237 => 1 |
| 1366x768 => 10  | 2560x1080 => 2 | 412x857 => 1   | 1536x960 => 1  |
| 1680x1050 => 8  | 3360x1890 => 2 | 1876x1173 => 1 | 1093x615 => 1  |
| 1600x900 => 7   | 1280x800 => 2  | 1529x640 => 1  | 1024x819 => 1  |
| 1440x900 => 6   | 2560x1440 => 1 | 2872x1203 => 1 | 412x892 => 1   |
| 3440x1440 => 5  | 1344x840 => 1  | 768x1024 => 1  |                |

Calculated average screen, viewport size: 1809x1048 pixels.

**Table S6.** Testing satisfaction core. Scale: 1-not satisfied, 5-very satisfied.

|                     | Mean   | N  | Std. Dev |
|---------------------|--------|----|----------|
| Satisfaction [1..5] | 4.4615 | 52 | 0.8561   |

**Table S7.** Familiarity with Slovenian eDavki Tax portal. Scale: 1-none, 2-somewhat familiar, 3-using sporadically, 4-using regularly.

|                    | Mean   | N   | Std. Dev |
|--------------------|--------|-----|----------|
| Familiarity [1..4] | 2.8214 | 112 | 0.8785   |

## 2. Demography

**Table S8.** Gender.

|         | N  | %        |
|---------|----|----------|
| Male    | 71 | 46.7105% |
| Female  | 40 | 26.3158% |
| Unknown | 41 | 26.9737% |

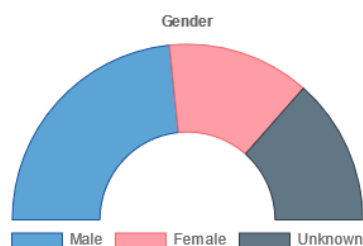**Figure S1.** Gender distribution graph.**Table S9.** Age and generation.

|                       | N   | %                | Min | Max |
|-----------------------|-----|------------------|-----|-----|
| Age (all w/o missing) | 114 | 100%             | 23  | 85  |
| Gen 1 (18–64)         | 86  | 75.438596491228% | 23  | 62  |
| Gen 2 (65+)           | 28  | 24.561403508772% | 65  | 85  |

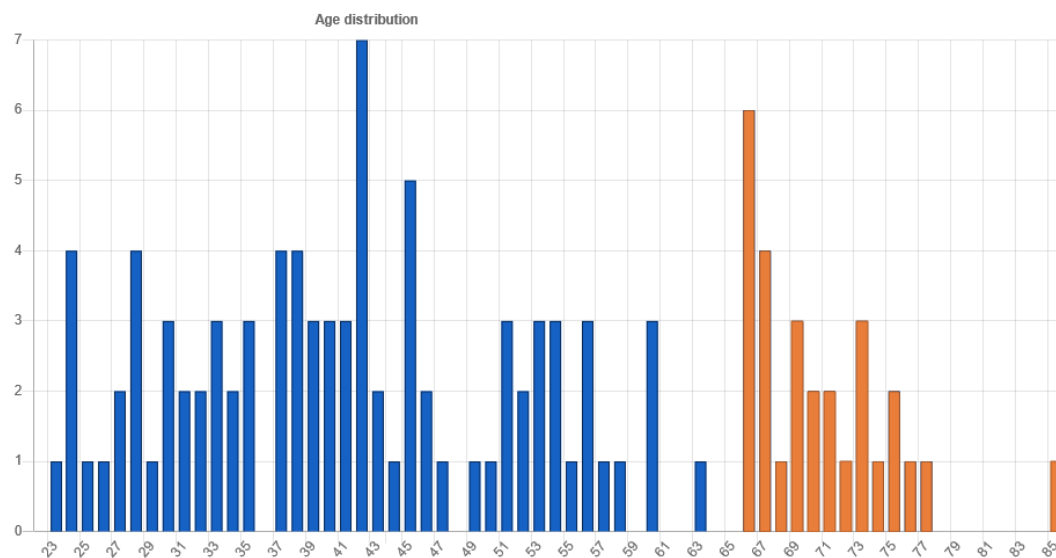**Figure S2.** Age distribution chart.

**Table S10.** Developmental goals question set vs. age based generation classification.

|                   | Fit (where age based generation = dev. goals based generation) % |
|-------------------|------------------------------------------------------------------|
| All               | 80.53%                                                           |
| Gen 1 = Age 18–64 | 83.53%                                                           |
| Gen 2 = Age 65+   | 71.43%                                                           |

### 3. Normality tests on samples

**Table S11.** Shapiro-Wilk formal test for normal distribution on samples within Interface 1 and Interface 2.

| Interface 1 samples                                  |                |                           |                               | Interface 2 samples |                           |                               |   |
|------------------------------------------------------|----------------|---------------------------|-------------------------------|---------------------|---------------------------|-------------------------------|---|
| Shapiro Wilk test for normal distribution of samples |                |                           |                               |                     |                           |                               |   |
|                                                      | W              | p-value                   | Result<br>( $\alpha = 0.05$ ) | W                   | p-value                   | Result<br>( $\alpha = 0.05$ ) |   |
| Performance metrics                                  |                |                           |                               |                     |                           |                               |   |
| Success rate                                         | 0.459998       | 0.000000                  | 0                             | 0.425303            | 0.000000                  | 0                             |   |
| Time on task (ms)                                    | 0.621031       | $6.66134 \times 10^{-16}$ | 0                             | 0.657893            | $3.33067 \times 10^{-16}$ | 0                             |   |
| User evaluation                                      |                |                           |                               |                     |                           |                               |   |
| SUS                                                  | 0.956919       | 0.0138985                 | 0                             | 0.959773            | 0.0167003                 | 0                             |   |
| UEQ                                                  | Attractiveness | 0.961109                  | 0.0288360                     | 0                   | 0.960028                  | 0.0183942                     | 0 |
|                                                      | Perspicuity    | 0.952945                  | 0.0103726                     | 0                   | 0.949040                  | 0.00441825                    | 0 |
|                                                      | Efficiency     | 0.980272                  | 0.336408                      | 1                   | 0.966096                  | 0.0419344                     | 0 |
|                                                      | Dependability  | 0.968541                  | 0.0753574                     | 1                   | 0.965148                  | 0.0368175                     | 0 |
|                                                      | Stimulation    | 0.956084                  | 0.0152913                     | 0                   | 0.955466                  | 0.0100609                     | 0 |
|                                                      | Novelty        | 0.955833                  | 0.0148215                     | 0                   | 0.969566                  | 0.0677256                     | 1 |
| NASA-TLX                                             | Mental         | 0.950850                  | 0.950850                      | 0                   | 0.952363                  | 0.00723613                    | 0 |
|                                                      | Physical       | 0.862331                  | 0.00000168307                 | 0                   | 0.864696                  | 0.00000116408                 | 0 |
|                                                      | Temporal       | 0.960003                  | 0.0250446                     | 0                   | 0.935711                  | 0.000969826                   | 0 |
|                                                      | Performance    | 0.893850                  | 0.0000223519                  | 0                   | 0.878830                  | 0.00000369816                 | 0 |
|                                                      | Effort         | 0.943684                  | 0.00343298                    | 0                   | 0.939527                  | 0.00150944                    | 0 |
|                                                      | Frustration    | 0.944909                  | 0.00395993                    | 0                   | 0.937016                  | 0.00112694                    | 0 |

**Table S12.** Shapiro-Wilk formal test for normal distribution on samples within Generation 1 and Generation 2.

| Generation 1 (18-64 years) samples                   |                |                           |                             | Generation 2 (65+ years) samples |                           |                             |   |
|------------------------------------------------------|----------------|---------------------------|-----------------------------|----------------------------------|---------------------------|-----------------------------|---|
| Shapiro Wilk test for normal distribution of samples |                |                           |                             |                                  |                           |                             |   |
|                                                      | W              | p-value                   | Result<br>( $\alpha=0.05$ ) | W                                | p-value                   | Result<br>( $\alpha=0.05$ ) |   |
| Performance metrics                                  |                |                           |                             |                                  |                           |                             |   |
| Success rate                                         | 0.704504       | $2.22045 \times 10^{-16}$ | 0                           | 0.752580                         | $2.29789 \times 10^{-10}$ | 0                           |   |
| Time on task (ms)                                    | 0.519431       | 0.00000                   | 0                           | 0.701698                         | $1.54325 \times 10^{-11}$ | 0                           |   |
| User evaluation                                      |                |                           |                             |                                  |                           |                             |   |
| SUS                                                  | 0.968550       | 0.136717                  | 1                           | 0.792181                         | 0.000130029               | 0                           |   |
| UEQ                                                  | Attractiveness | 0.943371                  | 0.00995052                  | 0                                | 0.925620                  | 0.0540142                   | 1 |
|                                                      | Perspicuity    | 0.917141                  | 0.000827075                 | 0                                | 0.887896                  | 0.00848780                  | 0 |
|                                                      | Efficiency     | 0.959074                  | 0.0515198                   | 1                                | 0.897900                  | 0.0140577                   | 0 |
|                                                      | Dependability  | 0.916087                  | 0.000753462                 | 0                                | 0.814195                  | 0.000310031                 | 0 |
|                                                      | Stimulation    | 0.896596                  | 0.000146051                 | 0                                | 0.884160                  | 0.00705592                  | 0 |
|                                                      | Novelty        | 0.883654                  | 0.0000531739                | 0                                | 0.926051                  | 0.0624379                   | 1 |
|                                                      | Mental         | 0.970761                  | 0.190398                    | 1                                | 0.971064                  | 0.630139                    | 1 |
| NASA-TLX                                             | Physical       | 0.885811                  | 0.0000720023                | 0                                | 0.905511                  | 0.0208291                   | 0 |
|                                                      | Temporal       | 0.980986                  | 0.518912                    | 1                                | 0.962829                  | 0.450261                    | 1 |
|                                                      | Performance    | 0.925173                  | 0.00190330                  | 0                                | 0.888781                  | 0.00887014                  | 0 |
|                                                      | Effort         | 0.977057                  | 0.360964                    | 1                                | 0.973571                  | 0.717010                    | 1 |
|                                                      | Frustration    | 0.971814                  | 0.212517                    | 1                                | 0.897680                  | 0.0139004                   | 0 |

#### 4. Interfaces global

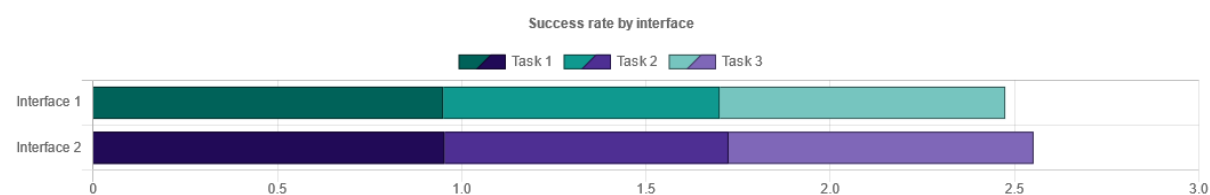

Figure S3. Task success rate chart stacked by interface.

Table S13. Success rate by interface.

|        | Interface 1 |           |      |        |            |            | Interface 2 |           |      |        |            |            | Mann-Whitney U test |                                            |
|--------|-------------|-----------|------|--------|------------|------------|-------------|-----------|------|--------|------------|------------|---------------------|--------------------------------------------|
|        | Mean        | Std. Dev. | N    | Conf.  | Conf. min. | Conf. max. | Mean        | Std. Dev. | N    | Conf.  | Conf. min. | Conf. max. | P-value             | H <sub>0</sub> rejection ( $\alpha=0.05$ ) |
| Task 1 | 0.95        | 0.2193    | 80   | 0.0481 | 0.9019     | 0.9981     | 0.954       | 0.2106    | 87   | 0.0443 | 0.9098     | 0.9983     | 0.9069              | 0                                          |
| Task 2 | 0.75        | 0.4357    | 80   | 0.0955 | 0.6545     | 0.8455     | 0.7701      | 0.4232    | 87   | 0.0889 | 0.6812     | 0.859      | 0.7633              | 0                                          |
| Task 3 | 0.775       | 0.4202    | 80   | 0.0921 | 0.6829     | 0.8671     | 0.8276      | 0.3799    | 87   | 0.0798 | 0.7478     | 0.9074     | 0.3966              | 0                                          |
| All    | 0.825       | 0.3808    | 2400 | 0.0482 | 0.7768     | 0.8732     | 0.8506      | 0.3572    | 2610 | 0.0433 | 0.8072     | 0.8939     | 0.4380              | 0                                          |

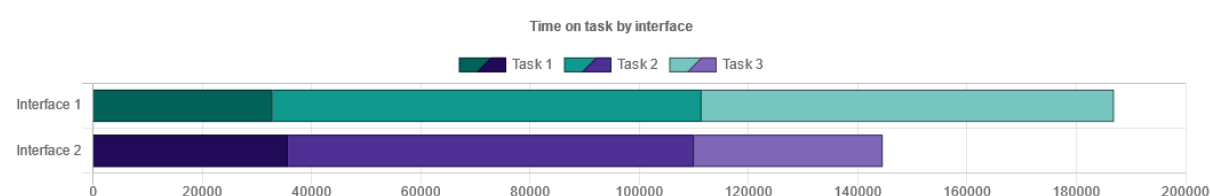

Figure S4. Time on task rate chart stacked by interface.

Table S14. Time on task by interface.

|        | Interface 1 |              |      |             |             |              | Interface 2 |             |      |             |             |             | Mann-Whitney U test |                                            |
|--------|-------------|--------------|------|-------------|-------------|--------------|-------------|-------------|------|-------------|-------------|-------------|---------------------|--------------------------------------------|
|        | Mean        | Std. Dev.    | N    | Conf.       | Conf. min.  | Conf. max.   | Mean        | Std. Dev.   | N    | Conf.       | Conf. min.  | Conf. max.  | P-value             | H <sub>0</sub> rejection ( $\alpha=0.05$ ) |
| Task 1 | 32,829.1    | 49,707.4971  | 80   | 10,892.6356 | 21,936.4644 | 43,721.7356  | 35,655.7586 | 61,211.6964 | 87   | 12,862.6621 | 22,793.0965 | 48,518.4207 | 0.5805              | 0                                          |
| Task 2 | 78,564.8375 | 98,171.977   | 80   | 21,512.883  | 57,051.9545 | 100,077.7205 | 74,403.0345 | 76,652.2793 | 87   | 16,107.2544 | 58,295.7801 | 90,510.2889 | 0.8993              | 0                                          |
| Task 3 | 75,518.1375 | 157,843.566  | 80   | 34,588.9964 | 40,929.1411 | 110,107.1339 | 34,501.2529 | 27,902.5466 | 87   | 5,863.2753  | 28,637.9776 | 40,364.5282 | 0.0005553           | 1                                          |
| All    | 62,304.025  | 112,585.6953 | 2401 | 14,244.0557 | 48,059.9693 | 76,548.0807  | 48,186.682  | 61,526.6014 | 2611 | 7,464.466   | 40,722.216  | 55,651.148  | 0.02112             | 1                                          |

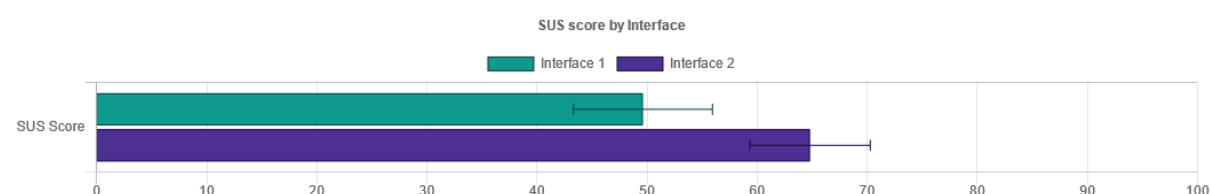

Figure S5. SUS score by interface chart.

**Table S15.** SUS score by interface.

|           | Interface 1 |           |     |            |            | Interface 2 |           |         |            |            | Mann-Whitney U test |                                            |          |   |
|-----------|-------------|-----------|-----|------------|------------|-------------|-----------|---------|------------|------------|---------------------|--------------------------------------------|----------|---|
|           | Mean        | Std. Dev. | N   | Conf. min. | Conf. max. | Mean        | Std. Dev. | N       | Conf. min. | Conf. max. | P-value             | H <sub>0</sub> rejection ( $\alpha=0.05$ ) |          |   |
| SUS Score | 49.6233     | 27.5242   | 736 | 31.41      | 43.3092    | 55.9374     | 64.8      | 24.1678 | 755        | 46.97      | 59.3303             | 70.2697                                    | 0.001044 | 1 |

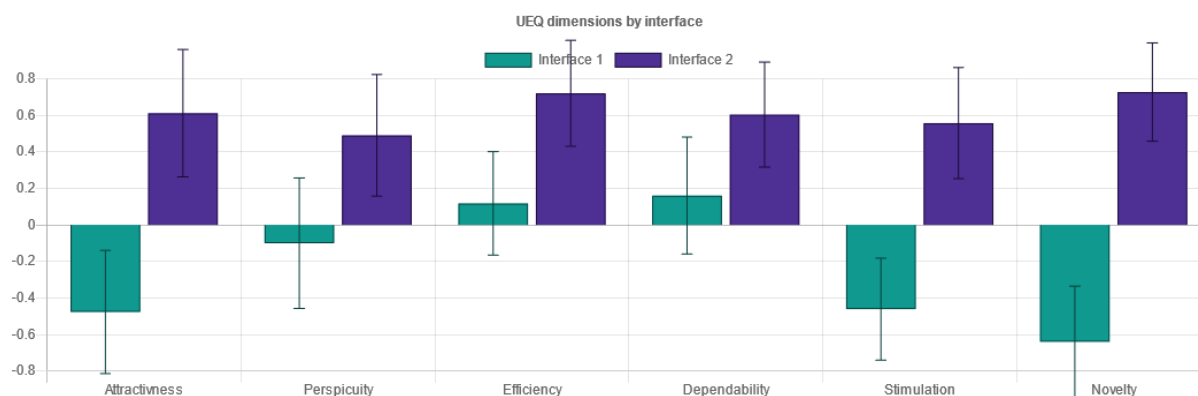**Figure S6.** UEQ results by interface chart.**Table S16.** UEQ results by interface.

| Item          | Interface 1 |           |    |        |            |            | Interface 2 |           |    |        |            |            | Mann-Whitney U test      |                       |
|---------------|-------------|-----------|----|--------|------------|------------|-------------|-----------|----|--------|------------|------------|--------------------------|-----------------------|
|               | Mean        | Std. Dev. | N  | Conf.  | Conf. min. | Conf. max. | Mean        | Std. Dev. | N  | Conf.  | Conf. min. | Conf. max. | P-value                  | Ho rejection (α=0.05) |
| Attractivness | -0.4762     | 1.4386    | 70 | 0.337  | -0.8132    | -0.1392    | 0.6111      | 1.5396    | 75 | 0.3484 | 0.2627     | 0.9596     | 0.00004424               | 1                     |
| Perspicuity   | -0.1        | 1.523     | 70 | 0.3568 | -0.4568    | 0.2568     | 0.49        | 1.469     | 75 | 0.3325 | 0.1575     | 0.8225     | 0.05805                  | 0                     |
| Efficiency    | 0.1179      | 1.2082    | 70 | 0.283  | -0.1652    | 0.4009     | 0.72        | 1.2807    | 75 | 0.2898 | 0.4302     | 1.0098     | 0.002178                 | 1                     |
| Dependability | 0.1607      | 1.3647    | 70 | 0.3197 | -0.159     | 0.4804     | 0.6033      | 1.2688    | 75 | 0.2872 | 0.3162     | 0.8905     | 0.07301                  | 0                     |
| Stimulation   | -0.4607     | 1.19      | 70 | 0.2788 | -0.7395    | -0.1819    | 0.5567      | 1.3423    | 75 | 0.3038 | 0.2529     | 0.8604     | 0.00004006               | 1                     |
| Novelty       | -0.6393     | 1.2991    | 70 | 0.3043 | -0.9436    | -0.3349    | 0.7267      | 1.1878    | 75 | 0.2688 | 0.4579     | 0.9955     | 8.112 × 10 <sup>-9</sup> | 1                     |

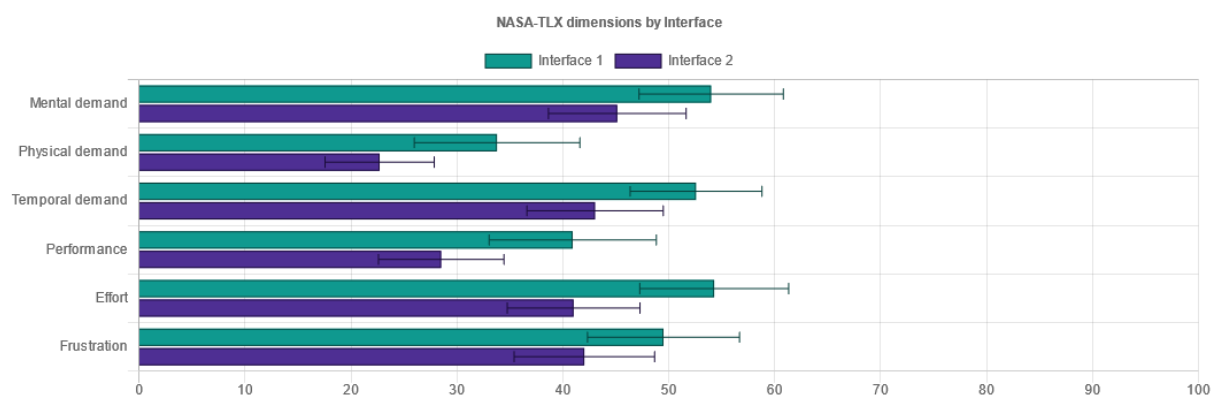**Figure S7.** NASA-Task Load Index results by interface chart.

**Table S17.** NASA-Task Load results by interface.

| Item            | Interface 1 |           |    |        |            |            | Interface 2 |           |    |        |            |            | Mann-Whitney U test |                                            |
|-----------------|-------------|-----------|----|--------|------------|------------|-------------|-----------|----|--------|------------|------------|---------------------|--------------------------------------------|
|                 | Mean        | Std. Dev. | N  | Conf.  | Conf. min. | Conf. max. | Mean        | Std. Dev. | N  | Conf.  | Conf. min. | Conf. max. | P-value             | H <sub>0</sub> rejection ( $\alpha=0.05$ ) |
| Mental demand   | 54          | 29.0751   | 70 | 6.8113 | 47.1887    | 60.8113    | 45.1351     | 28.5251   | 74 | 6.4993 | 38.6358    | 51.6344    | 0.05798             | 0                                          |
| Physical demand | 33.7857     | 33.367    | 70 | 7.8167 | 25.969     | 41.6024    | 22.7027     | 22.6224   | 74 | 5.1544 | 17.5483    | 27.8571    | 0.1228              | 0                                          |
| Temporal demand | 52.5714     | 26.5633   | 70 | 6.2229 | 46.3486    | 58.7943    | 43.0405     | 28.2457   | 74 | 6.4357 | 36.6049    | 49.4762    | 0.05035             | 0                                          |
| Performance     | 40.9286     | 33.7004   | 70 | 7.8948 | 33.0337    | 48.8234    | 28.5135     | 25.997    | 74 | 5.9233 | 22.5902    | 34.4368    | 0.05756             | 1                                          |
| Effort          | 54.2857     | 30.0035   | 70 | 7.0288 | 47.257     | 61.3145    | 41.0135     | 27.4982   | 74 | 6.2653 | 34.7482    | 47.2788    | 0.00692             | 1                                          |
| Frustration     | 49.5        | 30.6234   | 70 | 7.174  | 42.326     | 56.674     | 42.027      | 29.1068   | 74 | 6.6318 | 35.3952    | 48.6589    | 0.1599              | 0                                          |

## 5. Generations global

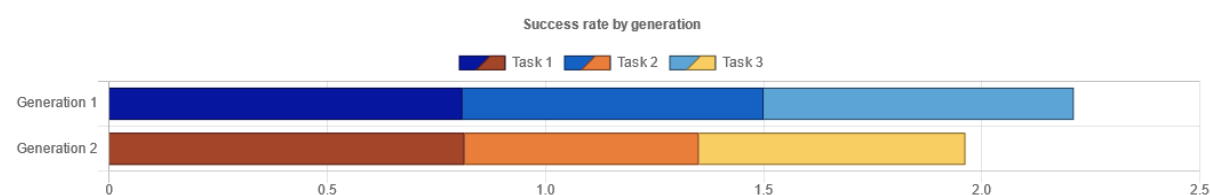**Figure S8.** Task success rate chart stacked by generation.**Table S18.** Success rate by generation.

|        | Generation 1 |           |      |        |            |            | Generation 2 |           |     |        |            |            | Mann-Whitney U test |                                            |
|--------|--------------|-----------|------|--------|------------|------------|--------------|-----------|-----|--------|------------|------------|---------------------|--------------------------------------------|
|        | Mean         | Std. Dev. | N    | Conf.  | Conf. min. | Conf. max. | Mean         | Std. Dev. | N   | Conf.  | Conf. min. | Conf. max. | P-value             | H <sub>0</sub> rejection ( $\alpha=0.05$ ) |
| Task 1 | 0.8099       | 0.2849    | 71   | 0.0663 | 0.7436     | 0.8761     | 0.8148       | 0.3439    | 270 | 0.1297 | 0.6851     | 0.9445     | 0.6290              | 0                                          |
| Task 2 | 0.6901       | 0.3814    | 71   | 0.0887 | 0.6014     | 0.7789     | 0.537        | 0.4143    | 270 | 0.1563 | 0.3808     | 0.6933     | 0.04754             | 1                                          |
| Task 3 | 0.7113       | 0.3748    | 71   | 0.0872 | 0.6241     | 0.7984     | 0.6111       | 0.3755    | 270 | 0.1417 | 0.4695     | 0.7528     | 0.1886              | 0                                          |
| All    | 0.7371       | 0.3521    | 2130 | 0.0473 | 0.6898     | 0.7844     | 0.6543       | 0.3924    | 810 | 0.0855 | 0.5689     | 0.7398     | 0.01021             | 1                                          |

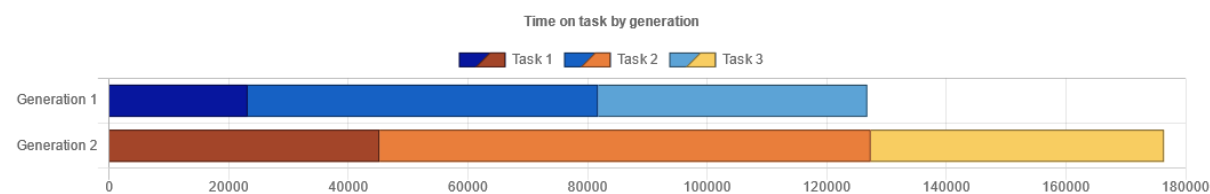**Figure S9.** Time on task rate chart stacked by generation.**Table S19.** Time on task by generation.

|        | Generation 1 |             |     |             |             |             | Generation 2 |             |     |             |             |              | Mann-Whitney U test |                                            |
|--------|--------------|-------------|-----|-------------|-------------|-------------|--------------|-------------|-----|-------------|-------------|--------------|---------------------|--------------------------------------------|
|        | Mean         | Std. Dev.   | N   | Conf.       | Conf. min.  | Conf. max.  | Mean         | Std. Dev.   | N   | Conf.       | Conf. min.  | Conf. max.   | P-value             | H <sub>0</sub> rejection ( $\alpha=0.05$ ) |
| Task 1 | 23,153.7746  | 32,132.148  | 71  | 7,474.2334  | 15,679.5413 | 30,628.008  | 45,195.2407  | 58,601.3752 | 272 | 22,104.5663 | 23,090.6745 | 67,299.807   | 0.00001916          | 1                                          |
| Task 2 | 58,604.4366  | 52,027.1281 | 71  | 12,101.9889 | 46,502.4477 | 70,706.4255 | 82,155.9444  | 85,350.5462 | 273 | 22,194.4117 | 49,961.5327 | 114,350.3562 | 0.4571              | 0                                          |
| Task 3 | 45,023.5     | 83,842.1178 | 71  | 19,502.4484 | 25,521.0516 | 64,525.9484 | 49,068.9444  | 37,964.7628 | 271 | 14,320.3911 | 34,748.5533 | 63,389.3356  | 0.2406              | 0                                          |
| All    | 42,260.5704  | 61,400.4579 | 213 | 8,245.8965  | 34,014.6739 | 50,506.4669 | 58,806.7099  | 65,042.9476 | 811 | 14,164.9086 | 44,641.8013 | 72,971.6185  | 0.003251            | 1                                          |

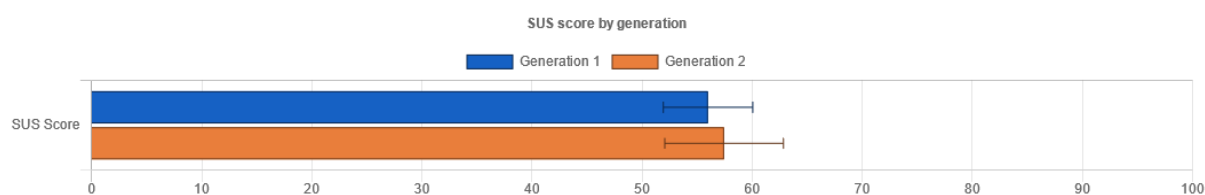

Figure S10. SUS score by generation chart.

Table S20. SUS score by generation.

|           | Generation 1 |           |    |            |            | Generation 2 |           |       |            |            | Mann-Whitney U test |                                   |        |   |
|-----------|--------------|-----------|----|------------|------------|--------------|-----------|-------|------------|------------|---------------------|-----------------------------------|--------|---|
|           | Mean         | Std. Dev. | N  | Conf. min. | Conf. max. | Mean         | Std. Dev. | N     | Conf. min. | Conf. max. | P-value             | H <sub>0</sub> rejection (α=0.05) |        |   |
| SUS Score | 55.9914      | 15.7832   | 58 | 4.062      | 51.9294    | 60.0534      | 57.4519   | 14.02 | 26         | 5.3891     | 52.0628             | 62.841                            | 0.7861 | 0 |

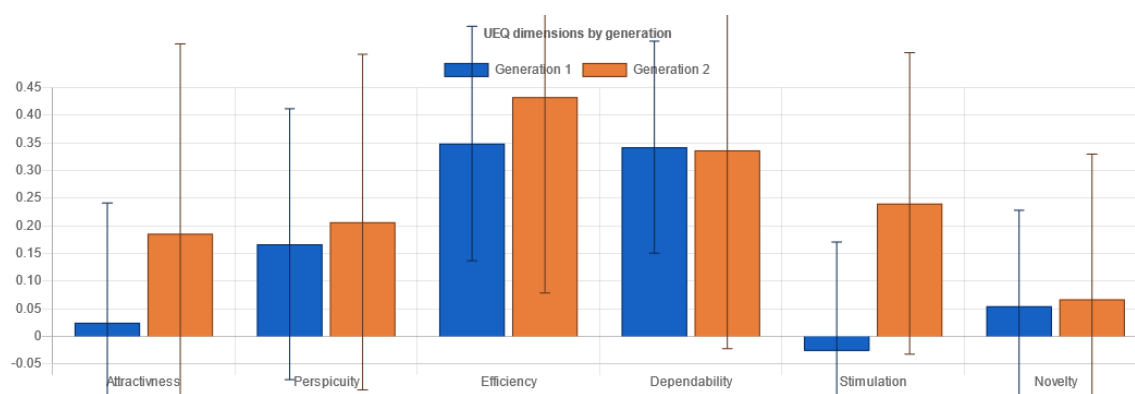

Figure S11. UEQ results by generation chart.

Table S21. UEQ results by generation.

| Item           | Generation 1 |           |    |        |            |            | Generation 2 |           |    |        |            |            | Mann-Whitney U Test |                                            |
|----------------|--------------|-----------|----|--------|------------|------------|--------------|-----------|----|--------|------------|------------|---------------------|--------------------------------------------|
|                | Mean         | Std. Dev. | N  | Conf.  | Conf. min. | Conf. max. | Mean         | Std. Dev. | N  | Conf.  | Conf. min. | Conf. max. | P-value             | H <sub>0</sub> rejection ( $\alpha=0.05$ ) |
| Attractiveness | 0.0249       | 0.833     | 57 | 0.2163 | -0.1914    | 0.2411     | 0.1859       | 0.892     | 26 | 0.3429 | -0.157     | 0.5288     | 0.5446              | 0                                          |
| Perspicuity    | 0.1667       | 0.9429    | 57 | 0.2448 | -0.0781    | 0.4115     | 0.2067       | 0.7889    | 26 | 0.3033 | -0.0965    | 0.51       | 0.9331              | 0                                          |
| Efficiency     | 0.3487       | 0.8162    | 57 | 0.2119 | 0.1368     | 0.5606     | 0.4327       | 0.9214    | 26 | 0.3542 | 0.0785     | 0.7869     | 0.5707              | 0                                          |
| Dependability  | 0.3421       | 0.7382    | 57 | 0.1916 | 0.1505     | 0.5337     | 0.3365       | 0.9333    | 26 | 0.3587 | -0.0222    | 0.6953     | 0.7929              | 0                                          |
| Stimulation    | -0.0263      | 0.7584    | 57 | 0.1969 | -0.2232    | 0.1706     | 0.2404       | 0.7088    | 26 | 0.2725 | -0.0321    | 0.5128     | 0.02848             | 1                                          |
| Novelty        | 0.0548       | 0.6673    | 57 | 0.1732 | -0.1184    | 0.2281     | 0.0673       | 0.6821    | 26 | 0.2622 | -0.1949    | 0.3295     | 0.57                | 0                                          |

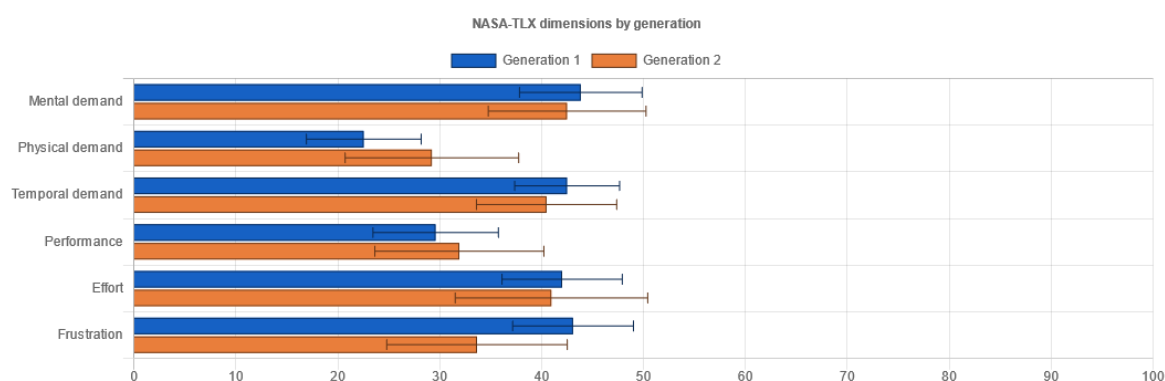

Figure S12. NASA-Task Load Index results by generation chart.

**Table S22.** NASA-Task Load results by generation.

| Item            | Generation 1 |           |    |        |            |            | Generation 2 |           |    |        |            |            | Mann-Whitney U test |                                            |
|-----------------|--------------|-----------|----|--------|------------|------------|--------------|-----------|----|--------|------------|------------|---------------------|--------------------------------------------|
|                 | Mean         | Std. Dev. | N  | Conf.  | Conf. min. | Conf. max. | Mean         | Std. Dev. | N  | Conf.  | Conf. min. | Conf. max. | P-value             | H <sub>0</sub> rejection ( $\alpha=0.05$ ) |
| Mental demand   | 43.8393      | 22.9771   | 56 | 6.0181 | 37.8212    | 49.8574    | 42.5         | 20.137    | 26 | 7.7404 | 34.7596    | 50.2404    | 0.9801              | 0                                          |
| Physical demand | 22.5446      | 21.5031   | 56 | 5.632  | 16.9126    | 28.1767    | 29.2308      | 22.1559   | 26 | 8.5165 | 20.7143    | 37.7472    | 0.1205              | 0                                          |
| Temporal demand | 42.5         | 19.6561   | 56 | 5.1483 | 37.3517    | 47.6483    | 40.4808      | 17.9028   | 26 | 6.8816 | 33.5992    | 47.3624    | 0.7602              | 0                                          |
| Performance     | 29.5982      | 23.4946   | 56 | 6.1536 | 23.4446    | 35.7518    | 31.9231      | 21.579    | 26 | 8.2947 | 23.6284    | 40.2178    | 0.6852              | 0                                          |
| Effort          | 42.0089      | 22.5349   | 56 | 5.9023 | 36.1067    | 47.9112    | 40.9615      | 24.5772   | 26 | 9.4472 | 31.5144    | 50.4087    | 0.8692              | 0                                          |
| Frustration     | 43.0804      | 22.6284   | 56 | 5.9267 | 37.1536    | 49.0071    | 33.6538      | 23.0459   | 26 | 8.8586 | 24.7953    | 42.5124    | 0.03818             | 1                                          |

## 6. Generation 1 (0-64 years old) by Interfaces

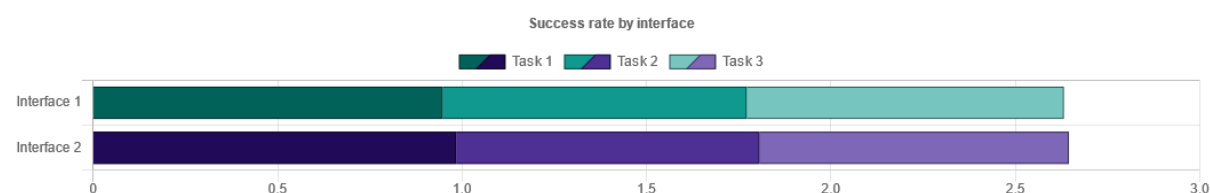**Figure S13.** Task success rate chart stacked by interface for Generation 1.**Table S23.** Success rate by interface for Generation 1.

|        | Interface 1 |           |     |        |            |            | Interface 2 |           |     |        |            |            | Mann-Whitney U test |                                            |
|--------|-------------|-----------|-----|--------|------------|------------|-------------|-----------|-----|--------|------------|------------|---------------------|--------------------------------------------|
|        | Mean        | Std. Dev. | N   | Conf.  | Conf. min. | Conf. max. | Mean        | Std. Dev. | N   | Conf.  | Conf. min. | Conf. max. | P-value             | H <sub>0</sub> rejection ( $\alpha=0.05$ ) |
| Task 1 | 0.9474      | 0.2253    | 57  | 0.0585 | 0.8889     | 1.0059     | 0.9839      | 0.127     | 62  | 0.0316 | 0.9523     | 1.0155     | 0.2755              | 0                                          |
| Task 2 | 0.8246      | 0.3837    | 57  | 0.0996 | 0.7249     | 0.9242     | 0.8226      | 0.3851    | 62  | 0.0959 | 0.7267     | 0.9185     | 0.9807              | 0                                          |
| Task 3 | 0.8596      | 0.3504    | 57  | 0.091  | 0.7687     | 0.9506     | 0.8387      | 0.3708    | 62  | 0.0923 | 0.7464     | 0.931      | 0.7544              | 0                                          |
| All    | 0.8772      | 0.3292    | 171 | 0.0493 | 0.8279     | 0.9265     | 0.8817      | 0.3238    | 186 | 0.0465 | 0.8352     | 0.9283     | 0.8964              | 0                                          |

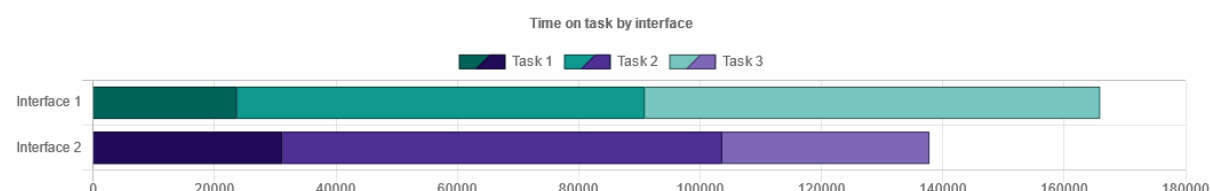**Figure S14.** Time on task rate chart stacked by interface for Generation 1.**Table S24.** Time on task by interface for Generation 1.

|        | Interface 1 |              |     |             |             |              | Interface 2  |              |     |             |             |             | Mann-Whitney U test    |                                            |
|--------|-------------|--------------|-----|-------------|-------------|--------------|--------------|--------------|-----|-------------|-------------|-------------|------------------------|--------------------------------------------|
|        | Mean        | Std. Dev.    | N   | Conf.       | Conf. min.  | Conf. max.   | Mean         | Std. Dev.    | N   | Conf.       | Conf. min.  | Conf. max.  | P-value                | H <sub>0</sub> rejection ( $\alpha=0.05$ ) |
| Task 1 | 23,717.6842 | 23,045.7753  | 57  | 5,982.8755  | 17,734.8087 | 29,700.5597  | 23,224.6452  | 265,222.9093 | 62  | 16,235.3028 | 14,989.3423 | 47,459.948  | 0.7678                 | 0                                          |
| Task 2 | 67,215.5088 | 85,927.6448  | 57  | 22,307.5334 | 44,907.9754 | 89,523.0422  | 272,428.1613 | 360,204.4881 | 62  | 14,986.1162 | 57,442.0451 | 87,414.2775 | $1.938 \times 10^{-7}$ | 1                                          |
| Task 3 | 75,014.5965 | 182,396.3249 | 57  | 47,351.6075 | 27,662.989  | 122,366.2043 | 153,306.5267 | 791.5876     | 62  | 6,668.9687  | 27,484.3378 | 40,822.2751 | 0.006499               | 1                                          |
| All    | 55,315.9298 | 118,653.0736 | 171 | 17,784.3095 | 37,531.6203 | 73,100.2394  | 45,935.371   | 56,469.0708  | 186 | 8,115.4058  | 37,819.9652 | 54,050.7768 | 0.4337                 | 0                                          |



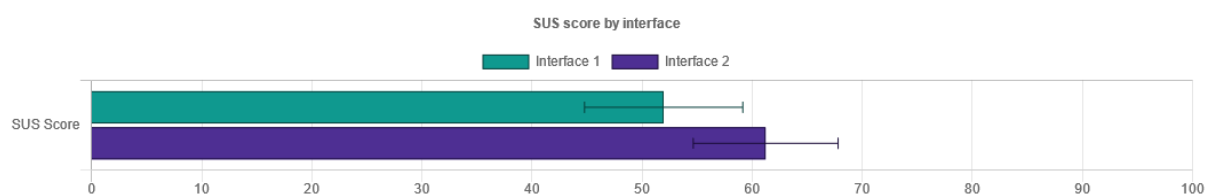

Figure S15. SUS score by interface chart for Generation 1.

Table S25. SUS score by interface for Generation 1.

| Interface 1 |         |           |    |        |            |            | Interface 2 |           |    |        |            | Mann-Whitney U test |         |                                            |
|-------------|---------|-----------|----|--------|------------|------------|-------------|-----------|----|--------|------------|---------------------|---------|--------------------------------------------|
|             | Mean    | Std. Dev. | N  | Conf.  | Conf. min. | Conf. max. | Mean        | Std. Dev. | N  | Conf.  | Conf. min. | Conf. max.          | P-value | H <sub>0</sub> rejection ( $\alpha=0.05$ ) |
| SUS Score   | 51.9608 | 26.1931   | 51 | 7.1888 | 44.772     | 59.1496    | 61.2264     | 24.4341   | 53 | 6.5783 | 54.6481    | 67.8047             | 0.0834  | 0                                          |

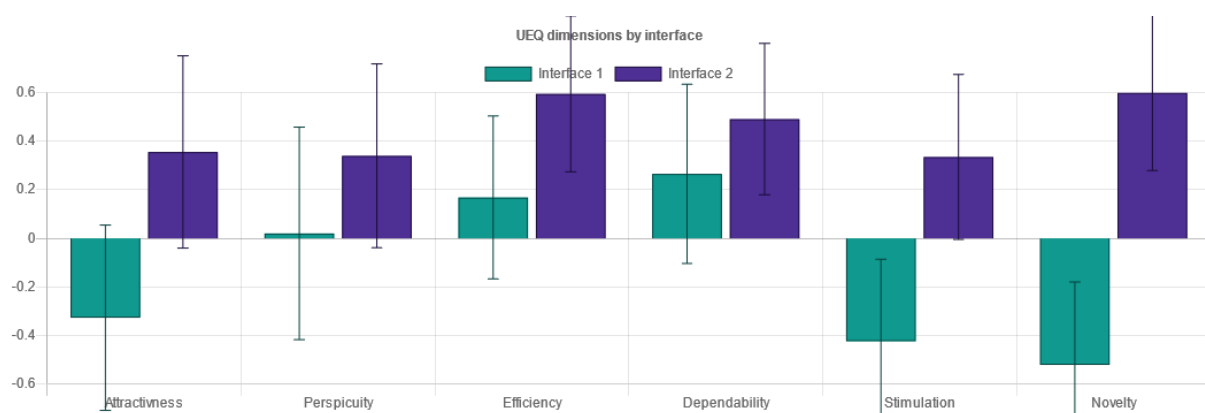

Figure S16. UEQ results by interface chart for Generation 1.

Table S26. UEQ results by interface for Generation 1.

| Item          | Interface 1 |           |    |        |            |            | Interface 2 |           |    |        |            | Mann-Whitney U test |            |                                   |
|---------------|-------------|-----------|----|--------|------------|------------|-------------|-----------|----|--------|------------|---------------------|------------|-----------------------------------|
|               | Mean        | Std. Dev. | N  | Conf.  | Conf. min. | Conf. max. | Mean        | Std. Dev. | N  | Conf.  | Conf. min. | Conf. max.          | P-value    | H <sub>0</sub> rejection (α=0.05) |
| Attractivness | -0.3265     | 1.3612    | 49 | 0.3811 | -0.7077    | 0.0546     | 0.3553      | 1.4687    | 53 | 0.3954 | -0.0401    | 0.7508              | 0.01971    | 1                                 |
| Perspiciuity  | 0.0204      | 1.5603    | 49 | 0.4369 | -0.4165    | 0.4573     | 0.3396      | 1.4032    | 53 | 0.3778 | -0.0382    | 0.7174              | 0.5165     | 0                                 |
| Efficiency    | 0.1684      | 1.1961    | 49 | 0.3349 | -0.1665    | 0.5033     | 0.5943      | 1.1911    | 53 | 0.3207 | 0.2737     | 0.915               | 0.06721    | 0                                 |
| Dependability | 0.2653      | 1.3164    | 49 | 0.3686 | -0.1033    | 0.6339     | 0.4906      | 1.156     | 53 | 0.3112 | 0.1793     | 0.8018              | 0.3961     | 0                                 |
| Stimulation   | -0.4235     | 1.2057    | 49 | 0.3376 | -0.7611    | -0.0859    | 0.3349      | 1.2595    | 53 | 0.3391 | -0.0042    | 0.674               | 0.007306   | 1                                 |
| Novelty       | -0.5204     | 1.2182    | 49 | 0.3411 | -0.8615    | -0.1793    | 0.5991      | 1.1892    | 53 | 0.3202 | 0.2789     | 0.9192              | 0.00002204 | 1                                 |

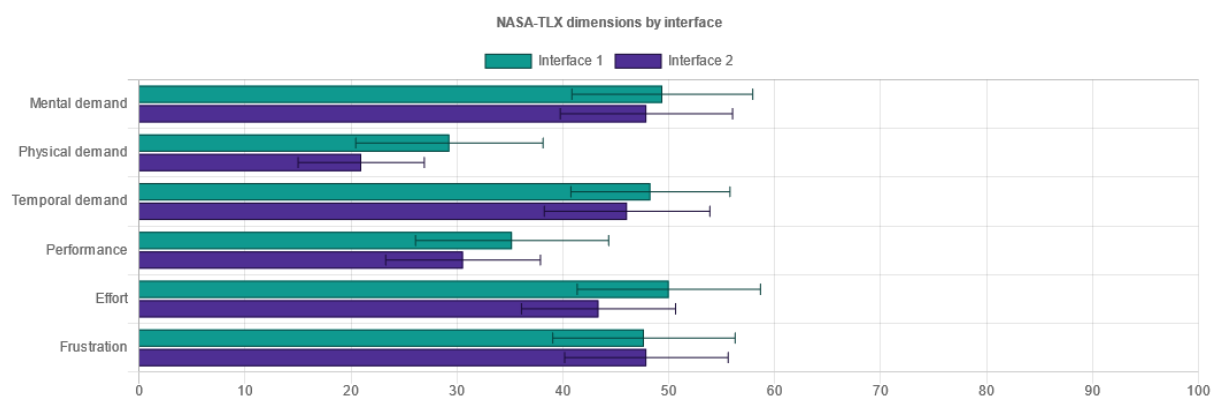

Figure S17. NASA-Task Load Index results by interface chart for Generation 1.

**Table S27.** NASA-Task Load results by interface for Generation 1.

| Item            | Interface 1 |           |     |       |            |            | Interface 2 |           |     |       |            |            | Mann-Whitney U test |                                |
|-----------------|-------------|-----------|-----|-------|------------|------------|-------------|-----------|-----|-------|------------|------------|---------------------|--------------------------------|
|                 | Mean        | Std. Dev. | N   | Conf. | Conf. min. | Conf. max. | Mean        | Std. Dev. | N   | Conf. | Conf. min. | Conf. max. | P-value             | Ho rejection ( $\alpha=0.05$ ) |
| Mental demand   | 49.3878     | 30.493    | 498 | 5381  | 40.8497    | 57.9258    | 47.8846     | 29.9239   | 528 | 1334  | 39.7512    | 56.018     | 0.7849              | 0                              |
| Physical demand | 29.2857     | 31.5733   | 498 | 8405  | 20.4452    | 38.1262    | 20.9615     | 21.9187   | 525 | 9576  | 15.004     | 26.9191    | 0.3923              | 0                              |
| Temporal demand | 48.2653     | 26.8202   | 497 | 5097  | 40.7556    | 55.775     | 46.0577     | 28.7541   | 527 | 8155  | 38.2422    | 53.8732    | 0.7407              | 0                              |
| Performance     | 35.2041     | 32.5634   | 499 | 1177  | 26.0863    | 44.3218    | 30.5769     | 26.874    | 527 | 3044  | 23.2725    | 37.8813    | 0.7712              | 0                              |
| Effort          | 50          | 30.8896   | 498 | 6491  | 41.3509    | 58.6491    | 43.3654     | 26.7655   | 52  | 7.275 | 36.0904    | 50.6403    | 0.2985              | 0                              |
| Frustration     | 47.6531     | 30.7392   | 49  | 8.607 | 39.0461    | 56.26      | 47.8846     | 28.394    | 527 | 7176  | 40.167     | 55.6022    | 0.8942              | 0                              |

## 7. Generation 2 (65+ years old) by Interfaces

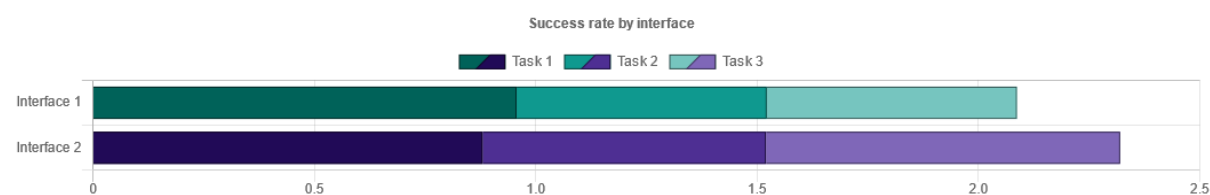**Figure S18.** Task success rate chart stacked by interface for Generation 2.**Table S28.** Success rate by interface for Generation 2.

|        | Interface 1 |           |    |        |            |            | Interface 2 |           |    |        |            |            | Mann-Whitney U test |                                |
|--------|-------------|-----------|----|--------|------------|------------|-------------|-----------|----|--------|------------|------------|---------------------|--------------------------------|
|        | Mean        | Std. Dev. | N  | Conf.  | Conf. min. | Conf. max. | Mean        | Std. Dev. | N  | Conf.  | Conf. min. | Conf. max. | P-value             | Ho rejection ( $\alpha=0.05$ ) |
| Task 1 | 0.9565      | 0.2085    | 23 | 0.0852 | 0.8713     | 1.0417     | 0.88        | 0.3317    | 25 | 0.13   | 0.75       | 1.01       | 0.3541              | 0                              |
| Task 2 | 0.5652      | 0.5069    | 23 | 0.2072 | 0.3581     | 0.7724     | 0.64        | 0.4899    | 25 | 0.192  | 0.448      | 0.832      | 0.609               | 0                              |
| Task 3 | 0.5652      | 0.5069    | 23 | 0.2072 | 0.3581     | 0.7724     | 0.8         | 0.4082    | 25 | 0.16   | 0.64       | 0.96       | 0.08508             | 0                              |
| All    | 0.6957      | 0.4635    | 69 | 0.1094 | 0.5863     | 0.805      | 0.7733      | 0.4215    | 75 | 0.0954 | 0.6779     | 0.8687     | 0.2936              | 0                              |

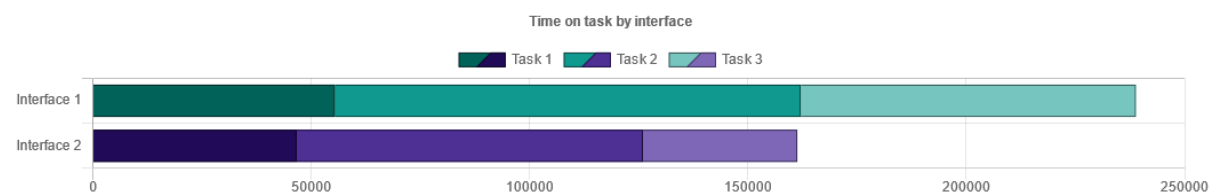**Figure S19.** Time on task rate chart stacked by interface for Generation 2.**Table S29.** Time on task by interface for Generation 2.

|        | Interface 1  |              |      |          |             |              | Interface 2 |              |      |            |              |              | Mann-Whitney U test |                                |
|--------|--------------|--------------|------|----------|-------------|--------------|-------------|--------------|------|------------|--------------|--------------|---------------------|--------------------------------|
|        | Mean         | Std. Dev.    | N    | Conf.    | Conf. min.  | Conf. max.   | Mean        | Std. Dev.    | N    | Conf.      | Conf. min.   | Conf. max.   | P-value             | Ho rejection ( $\alpha=0.05$ ) |
| Task 1 | 55,409.5652  | 82,295.1316  | 2333 | 633.0534 | 21,776.5118 | 89,042.6186  | 46,644.92   | 49,370.569   | 25   | 19,353.263 | 27,291.657   | 65,998.183   | 0.4328              | 0                              |
| Task 2 | 106,691.4348 | 121,049.2802 | 2349 | 471.4187 | 57,220.0161 | 156,162.8535 | 79,300.72   | 108,658.1587 | 2542 | 593.9982   | 236,706.7218 | 121,894.7182 | 0.08662             | 0                              |
| Task 3 | 76,766.0435  | 69,141.1476  | 2328 | 257.1747 | 48,508.8687 | 105,023.2182 | 35,364.16   | 31,053.8651  | 2512 | 173.1151   | 23,191.0449  | 47,537.2751  | 0.02192             | 1                              |
| All    | 79,622.3478  | 94,484.254   | 6922 | 294.1523 | 57,328.1955 | 101,916.5002 | 53,769.9333 | 72,692.9278  | 7516 | 451.9583   | 37,317.975   | 70,221.8917  | 0.004634            | 1                              |

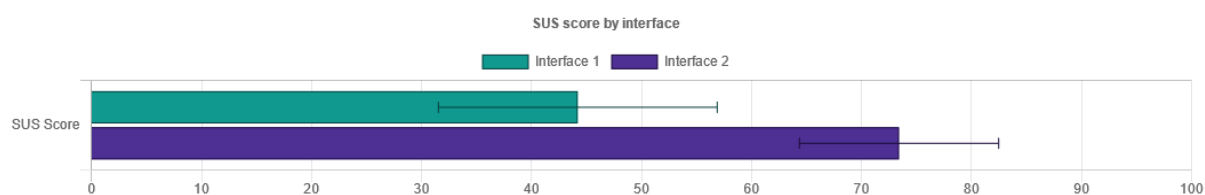

Figure S20. SUS score by interface chart for Generation 2.

Table S30. SUS score by interface for Generation 2.

| Interface 1 |         |           |    |         |            |            | Interface 2 |           |    |       |            | Mann-Whitney U test |          |                                            |
|-------------|---------|-----------|----|---------|------------|------------|-------------|-----------|----|-------|------------|---------------------|----------|--------------------------------------------|
|             | Mean    | Std. Dev. | N  | Conf.   | Conf. min. | Conf. max. | Mean        | Std. Dev. | N  | Conf. | Conf. min. | Conf. max.          | P-value  | H <sub>0</sub> rejection ( $\alpha=0.05$ ) |
| SUS Score   | 44.2045 | 30.3294   | 22 | 12.6739 | 31.5307    | 56.8784    | 73.4091     | 21.6787   | 22 | 9.059 | 64.3501    | 82.4681             | 0.002404 | 1                                          |

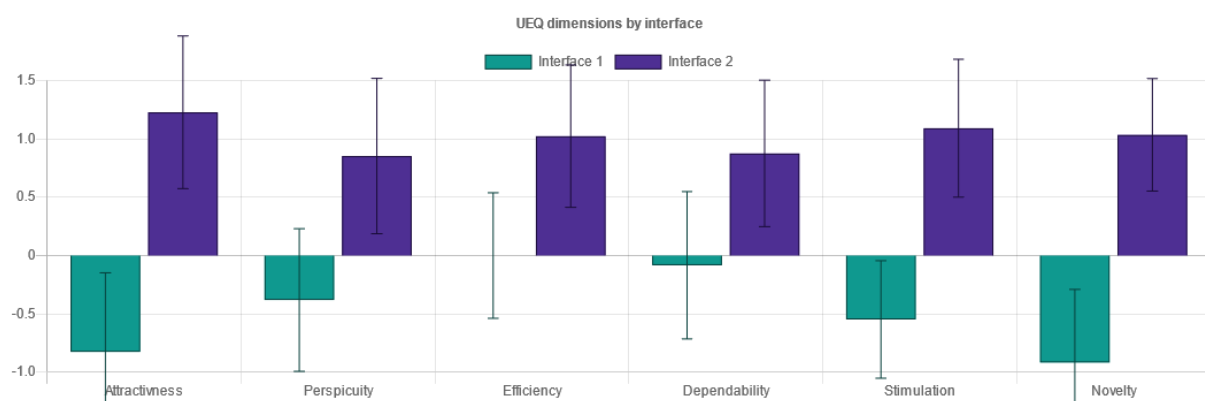

Figure S21. UEQ results by interface chart for Generation 2.

Table S31. UEQ results by interface for Generation 2.

| Item          | Interface 1 |           |    |        |            |            | Interface 2 |           |    |        |            | Mann-Whitney U test |           |                                            |
|---------------|-------------|-----------|----|--------|------------|------------|-------------|-----------|----|--------|------------|---------------------|-----------|--------------------------------------------|
|               | Mean        | Std. Dev. | N  | Conf.  | Conf. min. | Conf. max. | Mean        | Std. Dev. | N  | Conf.  | Conf. min. | Conf. max.          | P-value   | H <sub>0</sub> rejection ( $\alpha=0.05$ ) |
| Attractivness | -0.8254     | 1.5842    | 21 | 0.6776 | -1.503     | -0.1478    | 1.2273      | 1.5648    | 22 | 0.6539 | 0.5734     | 1.8812              | 0.0003404 | 1                                          |
| Perspicuity   | -0.381      | 1.4288    | 21 | 0.6111 | -0.992     | 0.2301     | 0.8523      | 1.5918    | 22 | 0.6652 | 0.1871     | 1.5174              | 0.01533   | 1                                          |
| Efficiency    | 0           | 1.2575    | 21 | 0.5378 | -0.5378    | 0.5378     | 1.0227      | 1.4596    | 22 | 0.6099 | 0.4128     | 1.6327              | 0.009041  | 1                                          |
| Dependability | -0.0833     | 1.4755    | 21 | 0.6311 | -0.7144    | 0.5477     | 0.875       | 1.5015    | 22 | 0.6274 | 0.2476     | 1.5024              | 0.06683   | 0                                          |
| Stimulation   | -0.5476     | 1.1769    | 21 | 0.5034 | -1.051     | -0.0442    | 1.0909      | 1.4133    | 22 | 0.5906 | 0.5003     | 1.6815              | 0.0006983 | 1                                          |
| Novelty       | -0.9167     | 1.4649    | 21 | 0.6265 | -1.5432    | -0.2901    | 1.0341      | 1.1529    | 22 | 0.4818 | 0.5523     | 1.5159              | 0.0001253 | 1                                          |

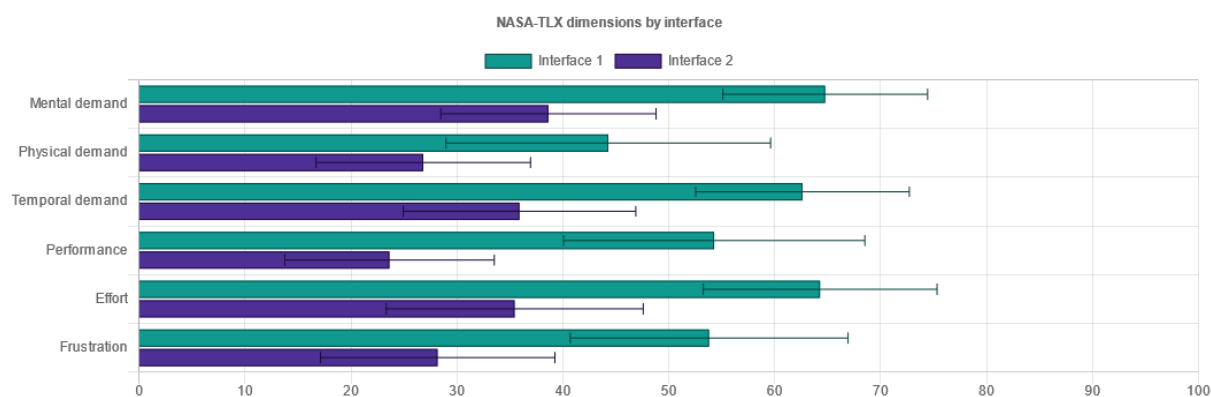

Figure S22. NASA-Task Load Index results by interface chart for Generation 2.

**Table S32.** NASA-Task Load results by interface for Generation 2.

| Item            | Interface 1 |           |    |         |            |            | Interface 2 |           |    |         |            |            | Mann-Whitney U test |                                            |
|-----------------|-------------|-----------|----|---------|------------|------------|-------------|-----------|----|---------|------------|------------|---------------------|--------------------------------------------|
|                 | Mean        | Std. Dev. | N  | Conf.   | Conf. min. | Conf. max. | Mean        | Std. Dev. | N  | Conf.   | Conf. min. | Conf. max. | P-value             | H <sub>0</sub> rejection ( $\alpha=0.05$ ) |
| Mental demand   | 64.7619     | 22.6095   | 21 | 9.6703  | 55.0917    | 74.4322    | 38.6364     | 24.3086   | 22 | 10.1579 | 28.4784    | 48.7943    | 0.0009371           | 1                                          |
| Physical demand | 44.2857     | 35.822    | 21 | 15.3213 | 28.9644    | 59.607     | 26.8182     | 24.2284   | 22 | 10.1244 | 16.6938    | 36.9426    | 0.1068              | 0                                          |
| Temporal demand | 62.619      | 23.5913   | 21 | 10.0901 | 52.5289    | 72.7092    | 35.9091     | 26.2604   | 22 | 10.9735 | 24.9356    | 46.8826    | 0.001727            | 1                                          |
| Performance     | 54.2857     | 33.2523   | 21 | 14.2222 | 40.0635    | 68.508     | 23.6364     | 23.6634   | 22 | 9.8883  | 13.7481    | 33.5247    | 0.003628            | 1                                          |
| Effort          | 64.2857     | 25.8014   | 21 | 11.0355 | 53.2503    | 75.3212    | 35.4545     | 29.0283   | 22 | 12.1301 | 23.3244    | 47.5847    | 0.003689            | 1                                          |
| Frustration     | 53.8095     | 30.6555   | 21 | 13.1116 | 40.6979    | 66.9211    | 28.1818     | 26.482    | 22 | 11.0661 | 17.1157    | 39.248     | 0.008767            | 1                                          |

## 8. Interface 1 (original) by Generations

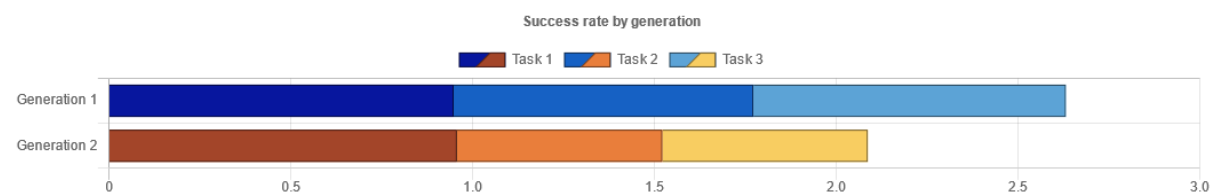**Figure S23.** Task success rate chart stacked by generation for Interface 1.**Table S33.** Success rate by by generation for Interface 1.

|        | Generation 1 |           |     |        |            |            | Generation 2 |           |    |        |            |            | Mann-Whitney U test |                                            |
|--------|--------------|-----------|-----|--------|------------|------------|--------------|-----------|----|--------|------------|------------|---------------------|--------------------------------------------|
|        | Mean         | Std. Dev. | N   | Conf.  | Conf. min. | Conf. max. | Mean         | Std. Dev. | N  | Conf.  | Conf. min. | Conf. max. | P-value             | H <sub>0</sub> rejection ( $\alpha=0.05$ ) |
| Task 1 | 0.9474       | 0.2253    | 57  | 0.0585 | 0.8889     | 1.0059     | 0.9565       | 0.2085    | 23 | 0.0852 | 0.8713     | 1.0417     | 0.8769              | 0                                          |
| Task 2 | 0.8246       | 0.3837    | 57  | 0.0996 | 0.7249     | 0.9242     | 0.5652       | 0.5069    | 23 | 0.2072 | 0.3581     | 0.7724     | 0.01629             | 1                                          |
| Task 3 | 0.8596       | 0.3504    | 57  | 0.091  | 0.7687     | 0.9506     | 0.5652       | 0.5069    | 23 | 0.2072 | 0.3581     | 0.7724     | 0.004669            | 1                                          |
| All    | 0.8772       | 0.3292    | 171 | 0.0493 | 0.8279     | 0.9265     | 0.6957       | 0.4635    | 69 | 0.1094 | 0.5863     | 0.805      | 0.0008334           | 1                                          |

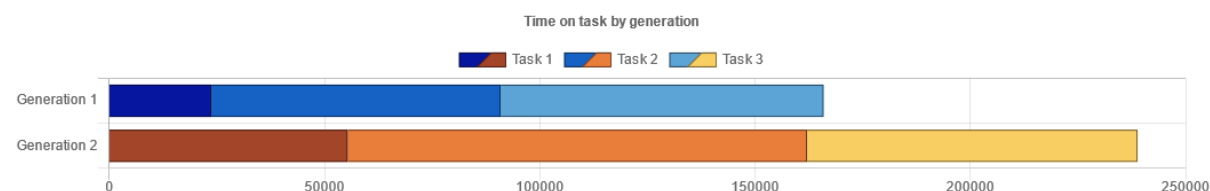**Figure S24.** Time on task rate chart stacked by generation for Interface 1.**Table S34.** Time on task by by generation for Interface 1.

|                   | Generation 1 |              |     |             |             |             | Generation 2 |             |               |              |              |              | Mann-Whitney U test |                                   |   |
|-------------------|--------------|--------------|-----|-------------|-------------|-------------|--------------|-------------|---------------|--------------|--------------|--------------|---------------------|-----------------------------------|---|
|                   | Mean         | Std. Dev.    | N   | Conf.       | Conf. min.  | Conf. max.  | Mean         | Std. Dev.   | N             | Conf.        | Conf. min.   | Conf. max.   | P-value             | H <sub>0</sub> rejection (α=0.05) |   |
| Task <sub>1</sub> | 23,717.6842  | 23,045.7753  | 57  | 5.982       | 8.755       | 17,734.8087 | 29,700.5597  | 55,409.5652 | 82,295.1316   | 2333.633     | 0.5342       | 1,776.5118   | 89,042.6186         | 0.0001268                         | 1 |
| Task <sub>2</sub> | 67,215.5088  | 85,927.6448  | 57  | 22,307.5334 | 44,907.9754 | 89,523.0422 | 10,669.1434  | 81,210.049  | 280,223.49    | 471.4187     | 57,220.0161  | 156,162.8535 | 0.1497              | 0                                 |   |
| Task <sub>3</sub> | 75,014.5965  | 182,396.3249 | 57  | 47,351.6075 | 27,662.989  | 122,366.204 | 76,766.0435  | 69,141.1476 | 2328,257.174  | 748,508.8687 | 105,023.2182 | 0.3333       | 0                   |                                   |   |
| All               | 55,315.9298  | 118,653.0736 | 171 | 7,784.3095  | 375,31.6203 | 73,100.2394 | 79,622.3478  | 94,484.254  | 6922,294.1523 | 357,328.1955 | 101,916.5002 | 0.001462     | 1                   |                                   |   |

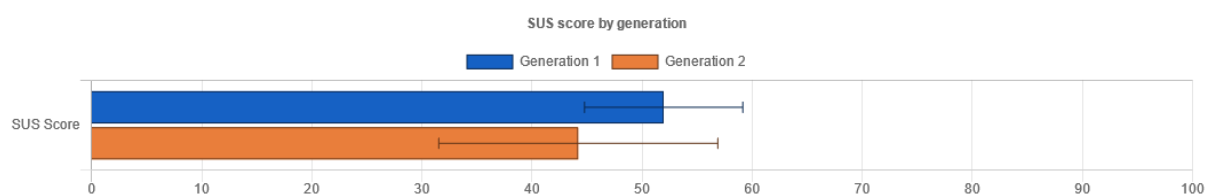

Figure S25. SUS score by generation for Interface 1.

Table S35. SUS score by generation for Interface 1.

|           | Generation 1 |           |    |        |            | Generation 2 |         |           |    |         | Mann-Whitney U test |            |         |                                            |
|-----------|--------------|-----------|----|--------|------------|--------------|---------|-----------|----|---------|---------------------|------------|---------|--------------------------------------------|
|           | Mean         | Std. Dev. | N  | Conf.  | Conf. min. | Conf. max.   | Mean    | Std. Dev. | N  | Conf.   | Conf. min.          | Conf. max. | P-value | H <sub>0</sub> rejection ( $\alpha=0.05$ ) |
| SUS Score | 51.9608      | 26.1931   | 51 | 7.1888 | 44.772     | 59.1496      | 44.2045 | 30.3294   | 22 | 12.6739 | 31.5307             | 56.8784    | 0.3238  | 0                                          |

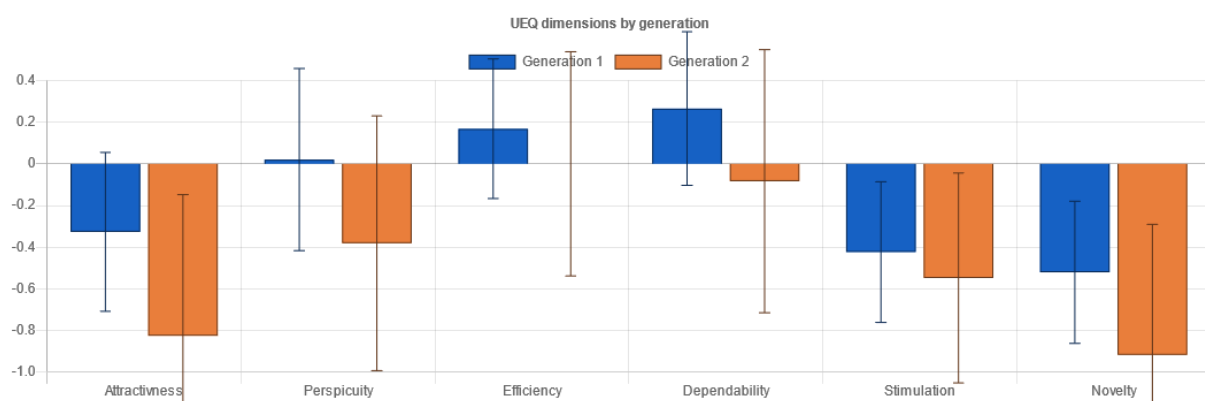

Figure S26. UEQ results by generation chart for Interface 1.

Table S36. UEQ results by generation for Interface 1.

| Item          | Generation 1 |           |    |        |            |            | Generation 2 |           |    |        |            |            | Mann-Whitney U test |                                   |
|---------------|--------------|-----------|----|--------|------------|------------|--------------|-----------|----|--------|------------|------------|---------------------|-----------------------------------|
|               | Mean         | Std. Dev. | N  | Conf.  | Conf. min. | Conf. max. | Mean         | Std. Dev. | N  | Conf.  | Conf. min. | Conf. max. | P-value             | H <sub>0</sub> rejection (α=0.05) |
| Attractivness | -0.3265      | 1.3612    | 49 | 0.3811 | -0.7077    | 0.0546     | -0.8254      | 1.5842    | 21 | 0.6776 | -1.503     | -0.1478    | 0.2107              | 0                                 |
| Perspicuity   | 0.0204       | 1.5603    | 49 | 0.4369 | -0.4165    | 0.4573     | -0.381       | 1.4288    | 21 | 0.6111 | -0.992     | 0.2301     | 0.3037              | 0                                 |
| Efficiency    | 0.1684       | 1.1961    | 49 | 0.3349 | -0.1665    | 0.5033     | 0            | 1.2575    | 21 | 0.5378 | -0.5378    | 0.5378     | 0.5243              | 0                                 |
| Dependability | 0.2653       | 1.3164    | 49 | 0.3686 | -0.1033    | 0.6339     | -0.0833      | 1.4755    | 21 | 0.6311 | -0.7144    | 0.5477     | 0.5234              | 0                                 |
| Stimulation   | -0.4235      | 1.2057    | 49 | 0.3376 | -0.7611    | -0.0859    | -0.5476      | 1.1769    | 21 | 0.5034 | -1.051     | -0.0442    | 0.75                | 0                                 |
| Novelty       | -0.5204      | 1.2182    | 49 | 0.3411 | -0.8615    | -0.1793    | -0.9167      | 1.4649    | 21 | 0.6265 | -1.5432    | -0.2901    | 0.2162              | 0                                 |

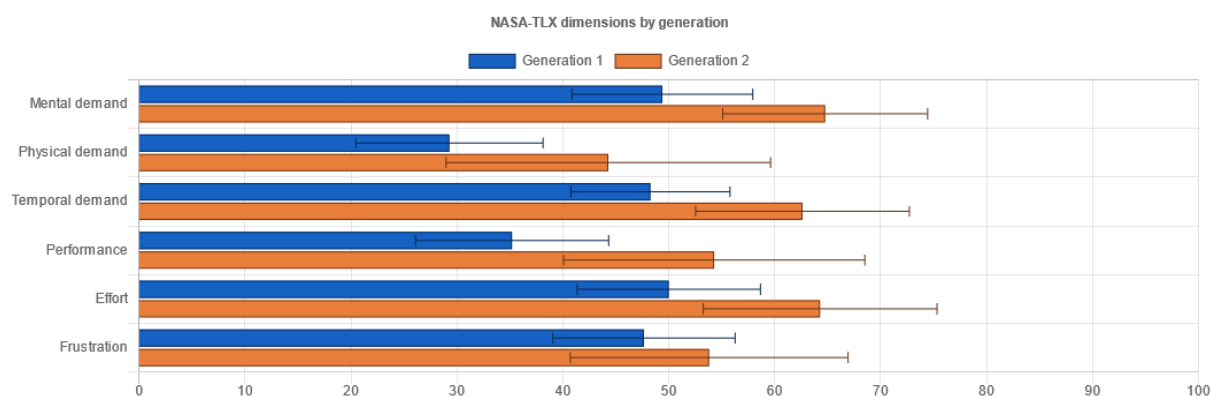

Figure S27. NASA-Task Load Index results by generation chart for Interface 1.

**Table S37.** NASA-Task Load results by generation for Interface 1.

| Item            | Generation 1 |           |          |         |            |            | Generation 2 |           |         |         |            |            | Mann-Whitney U test |                                            |
|-----------------|--------------|-----------|----------|---------|------------|------------|--------------|-----------|---------|---------|------------|------------|---------------------|--------------------------------------------|
|                 | Mean         | Std. Dev. | N        | Conf.   | Conf. min. | Conf. max. | Mean         | Std. Dev. | N       | Conf.   | Conf. min. | Conf. max. | P-value             | H <sub>0</sub> rejection ( $\alpha=0.05$ ) |
| Mental demand   | 49.3878      | 30.493    | 498.5381 | 40.8497 | 57.9258    | 64.7619    | 22.6095      | 21        | 9.6703  | 55.0917 | 74.4322    | 0.04407    | 1                   |                                            |
| Physical demand | 29.2857      | 31.5733   | 498.8405 | 20.4452 | 38.1262    | 44.2857    | 35.822       | 21        | 15.3213 | 28.9644 | 59.607     | 0.1166     | 0                   |                                            |
| Temporal demand | 48.2653      | 26.8202   | 497.5097 | 40.7556 | 55.775     | 62.619     | 23.5913      | 21        | 10.0901 | 52.5289 | 72.7092    | 0.03308    | 1                   |                                            |
| Performance     | 35.2041      | 32.5634   | 499.1177 | 26.0863 | 44.3218    | 54.2857    | 33.2523      | 21        | 14.2222 | 40.0635 | 68.508     | 0.01987    | 1                   |                                            |
| Effort          | 50           | 30.8896   | 498.6491 | 41.3509 | 58.6491    | 64.2857    | 25.8014      | 21        | 11.0355 | 53.2503 | 75.3212    | 0.06309    | 0                   |                                            |
| Frustration     | 47.6531      | 30.7392   | 49       | 8.607   | 39.0461    | 56.26      | 53.8095      | 30.6555   | 21      | 13.1116 | 40.6979    | 66.9211    | 0.418               | 0                                          |

## 9. Interface 2 (FCD based) by Generations

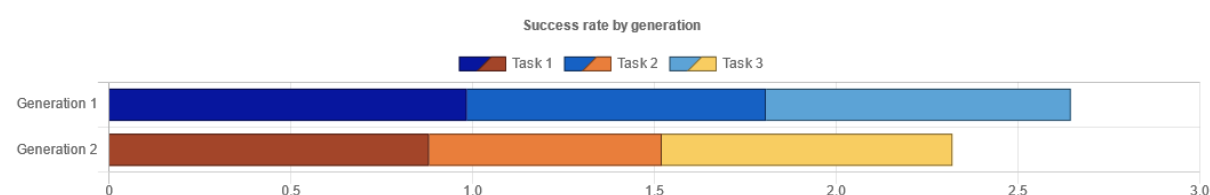**Figure S28.** Task success rate chart stacked by generation for Interface 2.**Table S38.** Success rate by generation for Interface 2.

|        | Generation 1 |           |     |        |            |            | Generation 2 |           |    |        |            |            | Mann-Whitney U test |                                            |
|--------|--------------|-----------|-----|--------|------------|------------|--------------|-----------|----|--------|------------|------------|---------------------|--------------------------------------------|
|        | Mean         | Std. Dev. | N   | Conf.  | Conf. min. | Conf. max. | Mean         | Std. Dev. | N  | Conf.  | Conf. min. | Conf. max. | P-value             | H <sub>0</sub> rejection ( $\alpha=0.05$ ) |
| Task 1 | 0.9839       | 0.127     | 62  | 0.0316 | 0.9523     | 1.0155     | 0.88         | 0.3317    | 25 | 0.13   | 0.75       | 1.01       | 0.0386              | 1                                          |
| Task 2 | 0.8226       | 0.3851    | 62  | 0.0959 | 0.7267     | 0.9185     | 0.64         | 0.4899    | 25 | 0.192  | 0.448      | 0.832      | 0.06959             | 0                                          |
| Task 3 | 0.8387       | 0.3708    | 62  | 0.0923 | 0.7464     | 0.931      | 0.8          | 0.4082    | 25 | 0.16   | 0.64       | 0.96       | 0.6724              | 0                                          |
| All    | 0.8817       | 0.3238    | 186 | 0.0465 | 0.8352     | 0.9283     | 0.7733       | 0.4215    | 75 | 0.0954 | 0.6779     | 0.8687     | 0.02663             | 1                                          |

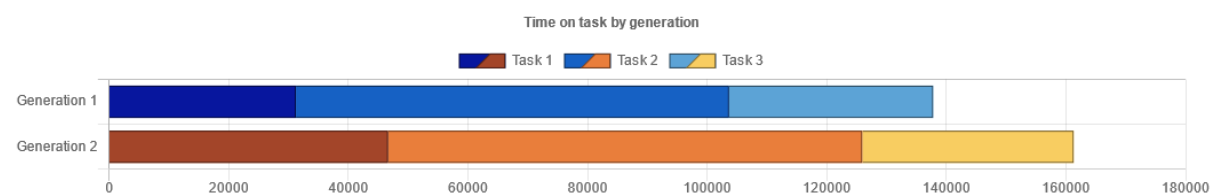**Figure S29.** Time on task rate chart stacked by generation for Interface 2.**Table S39.** Time on task by generation for Interface 2.

|        | Generation 1 |             |    |       |            |             | Generation 2 |             |           |            |                |             | Mann-Whitney U test |                       |         |   |
|--------|--------------|-------------|----|-------|------------|-------------|--------------|-------------|-----------|------------|----------------|-------------|---------------------|-----------------------|---------|---|
|        | Mean         | Std. Dev.   | N  | Conf. | Conf. min. | Conf. max.  | Mean         | Std. Dev.   | N         | Conf.      | Conf. min.     | Conf. max.  | P-value             | Ho rejection (α=0.05) |         |   |
| Task 1 | 31,224.64    | 5265,222.90 | 93 | 62    | 16,235.30  | 2814,989.34 | 23,475.94    | 8           | 46,644.92 | 49,370.56  | 25             | 19,353.26   | 27,291.65           | 65,998.18             | 0.06737 | 0 |
| Task 2 | 72,428.16    | 1360,204.48 | 81 | 62    | 14,986.11  | 6257,442.04 | 5187,414.27  | 75          | 79,300.72 | 108,658.15 | 872,542,593.99 | 8236,706.72 | 18121,894.71        | 82                    | 0.2524  | 0 |
| Task 3 | 34,153.30    | 6526,791.58 | 76 | 62    | 6,668.96   | 8727,484.33 | 7840,822.27  | 51          | 35,364.16 | 31,053.86  | 5123,191.04    | 49,537.27   | 51                  | 0.9551                | 0       |   |
| All    | 45,935.37    | 56,469.07   | 80 | 186   | 8,115.40   | 5837,819.96 | 5254,050.77  | 6853,769.93 | 333       | 72,692.92  | 7516,451.95    | 8337,317.97 | 70,221.89           | 17                    | 0.9285  | 0 |

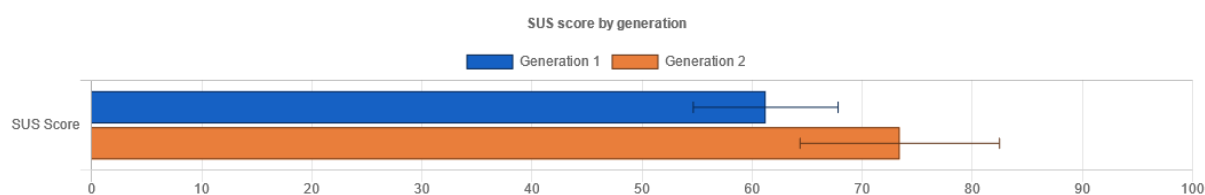

Figure S30. SUS score by generation for Interface 2.

Table S40. SUS score by generation for Interface 2.

| Generation 1 |         |           |    |        |            | Generation 2 |         |           |    |       |            | Mann-Whitney U test |         |                                            |
|--------------|---------|-----------|----|--------|------------|--------------|---------|-----------|----|-------|------------|---------------------|---------|--------------------------------------------|
|              | Mean    | Std. Dev. | N  | Conf.  | Conf. min. | Conf. max.   | Mean    | Std. Dev. | N  | Conf. | Conf. min. | Conf. max.          | P-value | H <sub>0</sub> rejection ( $\alpha=0.05$ ) |
| SUS Score    | 61.2264 | 24.4341   | 53 | 6.5783 | 54.6481    | 67.8047      | 73.4091 | 21.6787   | 22 | 9.059 | 64.3501    | 82.4681             | 0.04851 | 1                                          |

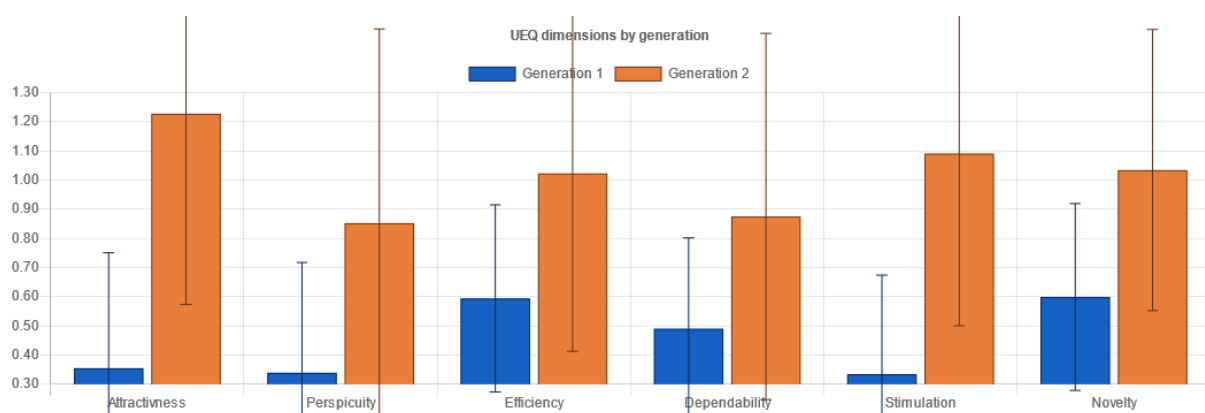

Figure S31. UEQ results by generation chart for Interface 2.

Table S41. UEQ results by generation for Interface 2.

| Item          | Generation 1 |           |    |        |            |            | Generation 2 |           |    |        |            | Mann-Whitney U test |         |                                            |
|---------------|--------------|-----------|----|--------|------------|------------|--------------|-----------|----|--------|------------|---------------------|---------|--------------------------------------------|
|               | Mean         | Std. Dev. | N  | Conf.  | Conf. min. | Conf. max. | Mean         | Std. Dev. | N  | Conf.  | Conf. min. | Conf. max.          | P-value | H <sub>0</sub> rejection ( $\alpha=0.05$ ) |
| Attractivness | 0.3553       | 1.4687    | 53 | 0.3954 | −0.0401    | 0.7508     | 1.2273       | 1.5648    | 22 | 0.6539 | 0.5734     | 1.8812              | 0.01791 | 1                                          |
| Perspicuity   | 0.3396       | 1.4032    | 53 | 0.3778 | −0.0382    | 0.7174     | 0.8523       | 1.5918    | 22 | 0.6652 | 0.1871     | 1.5174              | 0.1544  | 0                                          |
| Efficiency    | 0.5943       | 1.1911    | 53 | 0.3207 | 0.2737     | 0.915      | 1.0227       | 1.4596    | 22 | 0.6099 | 0.4128     | 1.6327              | 0.1583  | 0                                          |
| Dependability | 0.4906       | 1.156     | 53 | 0.3112 | 0.1793     | 0.8018     | 0.875        | 1.5015    | 22 | 0.6274 | 0.2476     | 1.5024              | 0.2291  | 0                                          |
| Stimulation   | 0.3349       | 1.2595    | 53 | 0.3391 | −0.0042    | 0.674      | 1.0909       | 1.4133    | 22 | 0.5906 | 0.5003     | 1.6815              | 0.03424 | 1                                          |
| Novelty       | 0.5991       | 1.1892    | 53 | 0.3202 | 0.2789     | 0.9192     | 1.0341       | 1.1529    | 22 | 0.4818 | 0.5523     | 1.5159              | 0.2736  | 0                                          |

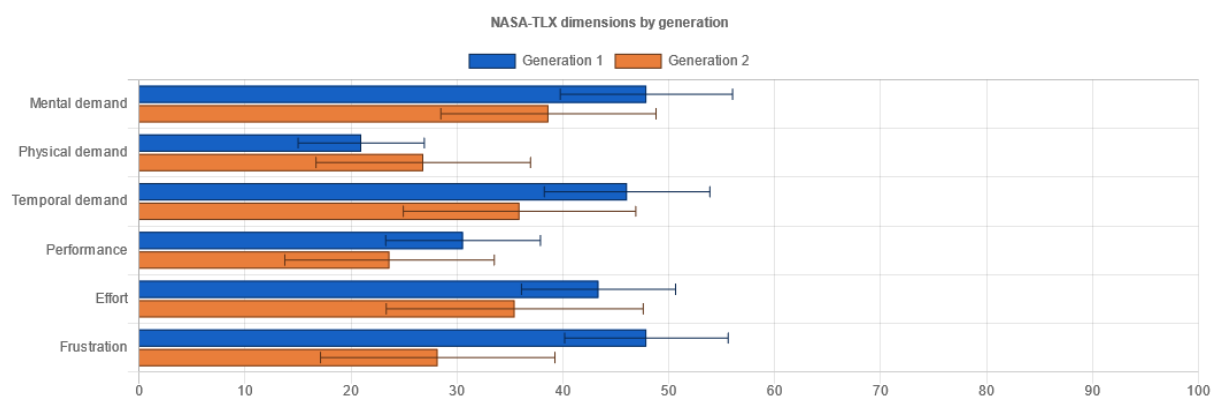

Figure S32. NASA-Task Load Index results by generation chart for Interface 2.

**Table S42.** NASA-Task Load results by generation for Interface 2.

| Item            | Generation 1 |           |          |         |            |            | Generation 2 |           |         |         |            |            | Mann-Whitney U test |                                            |
|-----------------|--------------|-----------|----------|---------|------------|------------|--------------|-----------|---------|---------|------------|------------|---------------------|--------------------------------------------|
|                 | Mean         | Std. Dev. | N        | Conf.   | Conf. min. | Conf. max. | Mean         | Std. Dev. | N       | Conf.   | Conf. min. | Conf. max. | P-value             | H <sub>0</sub> rejection ( $\alpha=0.05$ ) |
| Mental demand   | 47.8846      | 29.9239   | 528.1334 | 39.7512 | 56.018     | 38.6364    | 24.3086      | 2210.1579 | 28.4784 | 48.7943 | 0.2224     | 0          |                     |                                            |
| Physical demand | 20.9615      | 21.9187   | 525.9576 | 15.004  | 26.9191    | 26.8182    | 24.2284      | 2210.1244 | 16.6938 | 36.9426 | 0.3212     | 0          |                     |                                            |
| Temporal demand | 46.0577      | 28.7541   | 527.8155 | 38.2422 | 53.8732    | 35.9091    | 26.2604      | 2210.9735 | 24.9356 | 46.8826 | 0.2672     | 0          |                     |                                            |
| Performance     | 30.5769      | 26.874    | 527.3044 | 23.2725 | 37.8813    | 23.6364    | 23.6634      | 22 9.8883 | 13.7481 | 33.5247 | 0.3787     | 0          |                     |                                            |
| Effort          | 43.3654      | 26.7655   | 52 7.275 | 36.0904 | 50.6403    | 35.4545    | 29.0283      | 2212.1301 | 23.3244 | 47.5847 | 0.2503     | 0          |                     |                                            |
| Frustration     | 47.8846      | 28.394    | 527.7176 | 40.167  | 55.6022    | 28.1818    | 26.482       | 2211.0661 | 17.1157 | 39.248  | 0.007147   | 1          |                     |                                            |
